# Supplementary material for: MoS2 nanosheets with expanded interlayer spacing for enhanced sodium storage
Source: Royal Society of Chemistry journal article supplement (doi:10.1039/c8qi00969d), 2018-01-01
Supplement: c8qi00969d1.pdf [file c8qi00969d1.pdf]

**Electronic Supplementary Information for**

**MoS<sub>2</sub> nanosheets with expanded interlayer spacing for enhanced sodium storage**

Huishuang Dong,<sup>a</sup> Yang Xu,<sup>\*,b</sup> Chenglin Zhang,<sup>b</sup> Yuhan Wu,<sup>b</sup> Min Zhou,<sup>b</sup> Long Liu,<sup>b</sup> Yulian Dong,<sup>a</sup> Qun Fu,<sup>a</sup> Minghong Wu<sup>a</sup> and Yong Lei<sup>\*,a,b</sup>

<sup>a</sup>Institute of Nanochemistry and Nanobiology, School of Environmental and Chemical Engineering,  
Shanghai University, Shanghai 200444, China

<sup>b</sup>Fachgebiet Angewandte Nanophysik, Institut für Physik & ZMN MacroNano (ZIK), Technische  
Universität Ilmenau, Ilmenau 98693, Germany

Email: yang.xu@tu-ilmenau.de; yong.lei@tu-ilmenau.de

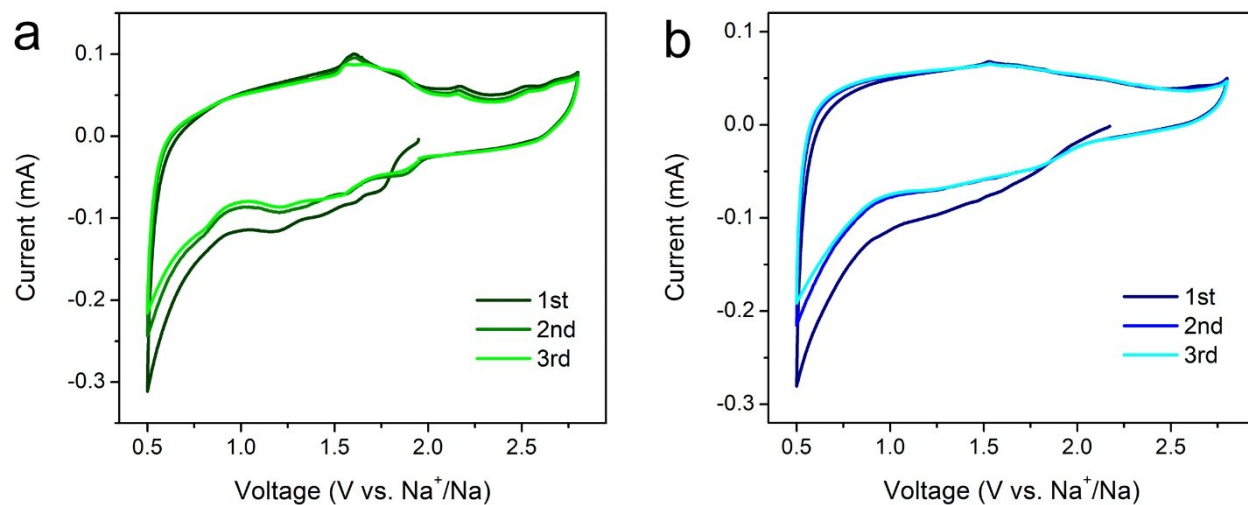

**Figure S1.** CV curves of E140 (a) and E160 (b) for the first three cycles at  $0.1 \text{ mV s}^{-1}$ .

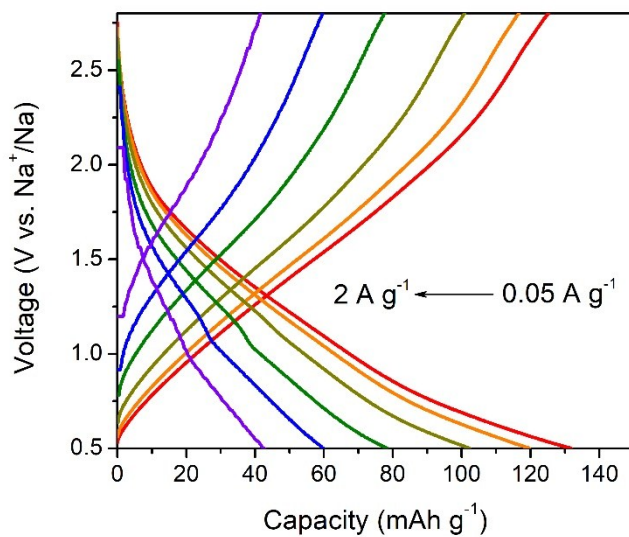

**Figure S2.** Charge/discharge profiles of E160 at various current densities.

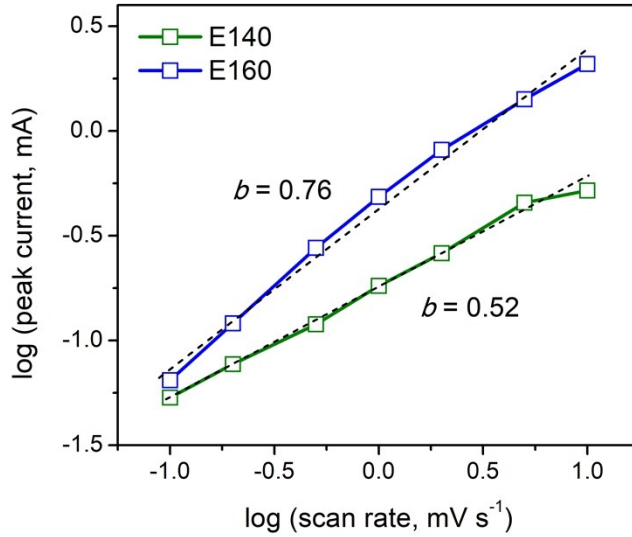

**Figure S3.**  $b$ -value determination from the peak current of the anodic scan at a scan rate range of 0.1 to 10  $\text{mV s}^{-1}$ .

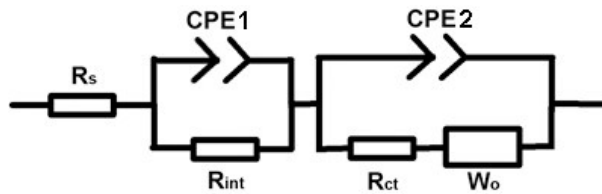

**Figure S4.** Equivalent circuit used for fitting Nyquist plots, where  $R_s$  is the total resistance of electrolyte, electrode, current collector and separator,  $R_{int}$  is the interface resistance from SEI,  $R_{ct}$  is the charge transfer resistance,  $W_o$  is the Warburg impedance, and  $CPE1$  and  $CPE2$  stand for constant phase elements that are related to the capacitive behavior at the interface and in the bulk electrode, respectively.

**Table R1.** Fitting results of resistances in the equivalent circuit.

|             | $R_{ct}$ ( $\Omega$ ) |       |       | $R_{int}$ ( $\Omega$ ) |      |      | $R_s$ ( $\Omega$ ) |      |      |
|-------------|-----------------------|-------|-------|------------------------|------|------|--------------------|------|------|
|             | 2nd                   | 10th  | 30th  | 2nd                    | 10th | 30th | 2nd                | 10th | 30th |
| <b>E140</b> | 53.9                  | 4907  | 31992 | 83.1                   | 80.1 | 55.4 | 21.2               | 21.6 | 27.8 |
| <b>E160</b> | 101.8                 | 207.6 | 295.3 | 13.8                   | 23.2 | 31.8 | 13.0               | 12.4 | 12.5 |
